# Supplementary material for: Glioma Specific Extracellular Missense Mutations in the First Cysteine Rich Region of Epidermal Growth Factor Receptor (EGFR) Initiate Ligand Independent Activation
Source: Cancers (Basel). 2011 Apr 18;3(2):2032–49. doi: 10.3390/cancers3022032 (PMC3757403; doi:10.3390/cancers3022032)
Supplement: Supplementary File 1 — PDF-Document (PDF, 367 KB) [file cancers-03-02032-s001.pdf]

**Supplementary Table 1:** Primer sequences used for introduction of EGFR ECD mutations

| Primer    | Sequence (5' → 3')*                                         |
|-----------|-------------------------------------------------------------|
| A289V For | GGC AAA TAC AGC TTT GGT G <u>I</u> C ACC TGC GTG AAG AAG TG |
| A289V Rev | CAC TTC TTC ACG CAG GTG <u>A</u> CA CCA AAG CTG TAT TTG CC  |
| R324L For | GAG GAA GAC GGC GTC C <u>I</u> C AAG TGT AAG AAG TGC        |
| R324L Rev | GCA CTT CTT ACA CTT G <u>A</u> G GAC GCC GTC TTC CTC        |
| E330K For | GCA AGT GTA AGA AGT GCA <u>A</u> AG GGC CTT GCC GCA AAG     |
| E330K Rev | CTT TGC GGC AAG GCC CT <u>I</u> TGC ACT TCT TAC ACT TGC     |
| C16S For  | GAT CAC GGC TCG <u>A</u> GC GTC CGA GCC T                   |
| C16S Rev  | AGG CTC GGA CGC <u>I</u> CG AGC CGT GAT C                   |

\* Underlined sequence depicts the mutated nucleotide
